# Supplementary material for: Enrichment of Glial Cells From Human Post-mortem Tissue for Transcriptome and Proteome Analysis Using Immunopanning
Source: Front Cell Neurosci. 2021 Dec 13;15:772011. doi: 10.3389/fncel.2021.772011 (PMC8711556; doi:10.3389/fncel.2021.772011)
Supplement: Supplementary file 2 [file Table_1.xlsx]

## Sheet: Material 
				Material	Supplier	Order nummer
				β-Mercaptoethanol	Gibco	31350-010
				Bovine albumine (BSA) 7.5%	Gibco	15260037
				Bovine albumine (BSA, for Ovo stock solutions)	Sigma	A8806
				Cell scraper	Corning	541070
				Cells strainers 70µm	Corning	431751
				DNAse	Sigma-Aldrich	D4527
				Dulbecco’s modified eagle medium (DMEM)	Gibco	11960-044
				45% D(+)-Glucose	Sigma	G8769
				1x Earle’s balanced salt solution (with NaHCO3)	Sigma	E6267
				10x Earle’s balanced salt solution (without NaHCO3)	Sigma	E7510
				Ethylenediaminetetraacetic acid (EDTA)	Millipore	6381-92-6
				Fetal bovine serum (FBS)	Gibco	10270-160
				Gentamycin	Gibco	15750037
				200 mM Glutamine	Gibco	25030-024
				Goat anti-rat IgG (H+L)	Jackson ImmunoResearch	112-005-167
				Goat anti-mouse IgG+IgM (H+L)	Jackson ImmunoResearch	115-005-044
				Ham's F-10 nutrient mix	Gibco	31550
				L-Cysteine hydrochloride monochloride (L-Cysteine)	Sigma	C7880
				Monoclonal mouse IgM clone O4	R&D systems	MAB1226
				Mouse anti-human HepaCAM	R&D systems	MAB4108
				Mouse anti-human CD11b	BioRAD	MCA551
				Sodium bicarbonate (NaHCO3)	Sigma	S5761
				Papain	Worthington	LS 03126
				15 mm x 150 mm polystyrene petri dishes	Sigma	P5981
				15 mm x 100 mm polystyrene petri dishes	Sigma	P5731
				Penicillin-streptomycin	Gibco	15140122
				Phosphate buffered saline (dPBS)	Gibco	14190144
				Protein inhibitor cocktail	Roche	469159001
				Tris (hydroxymethyl) aminomethane	Roche	77-86-1
				Trypsin 30,000 units/ml stock	Sigma	T9935
				Trypsin inhibitor (Ovomucoid)	Worthington	LS003083
				RLT buffer	Qiagen	79216
				Urea	BioRAD	161-0731

## Sheet: Solutions 
	STOCK SOLUTIONS					WORKING SOLUTIONS ( for 2 grams tissue, prepare the same day)				ANTIBODY SOLUTIONS (prepare before coating)				LYSIS BUFFER (prepare freshly)				CELL CULTURE MEDIUM
	Volume	Component	Final concentration	Storage		Volume	Component	Final concentration		Volume	Component	Final concentration		Volume	Component	Final concentration		Volume	Component	Final concentration
	Collection medium			4°C		Enzyme solution (ES+)				Secondary antibodies				Protein buffer				Culture medium
	17.5 ml	DMEM				80 ml	Enzyme stock, equilibrated			250 ml	Coating buffer			2 ml	250 mM Tris pH 8.5	50 mM		180 ml	DMEM
	17.5 ml	HAMF10				125 µl	Papain	20 units/ml		600 µl	anti-mouse antibody	5.5 µg/ml		4.8 g	Urea			180 ml	HAMF10
	35 µl	Gentamycin	50 µg/ml			440 µl	1M L-Cysteine	5.5 mM										40 ml	FBS	0.1
	35 ml final					80 ml final									Protease inhibitor cocktail			4 ml	Pen/Strep	100 U/ml
										Primary antibodies				add to 10 ml	dH2O			2 ml	Glutamine	1 mM
										60 ml	Blocking solution			10 ml final		set pH to 8.5 at 4°C
	Enzyme stock solution			4°C		Low OVO				80 µl	anti-CD11b antibody	1.3 µg/ml
	50 ml	10x EBSS				84 ml	Inhibitor stock, equilibrated
	5 ml	45% D(+)-Glucose	0.45%			6 ml	low OVO stock			60ml	Blocking solution			Lysis buffer
	13 ml	1M NaHCO3	26 mM			90 ml final				48 µl	anti-O4 antibody	0.4 µg/ml		2 ml	RLT
	5 ml	50 mM EDTA	0.5 mM											20 µl	β-Mercaptoethanol	0.01
	427 ml	ddH2O								30 ml	Blocking solution
	500 ml final					High OVO				40 µl	anti-HepaCAM antibody	0.7 µg/ml
						20 ml	Inhibitor stock, equilibrated
	Inhibitor stock solution			4°C		4 ml	high OVO stock
	50 ml	10x EBSS				40 µl	DNase	20 units/ml
	5 ml	45% D(+)-Glucose	0.45%			24 ml final
	13 ml	1M NaHCO3	26 mM
	432 ml	ddH2O
	500 ml final					Blocking buffer
						155 ml	dPBS
						4.5 ml	BSA (7,5%)	0.002
	High Ovo stock solution			aliquots at -20°C		160 ml final
	1 g	BSA	0.04
	1 g	Trypsin inhibitor	0.04
	add to 25 ml	EBSS				Panning solution
	25 ml final		set pH to 7.4			20 ml	PBS
						50 µl	BSA (7,5%)	0.0002
						20 µl	0.4% DNase	12.5 units/ml
	Low Ovo stock solution			aliquots at -20°C		20 ml final
	1 g	BSA	0.02
	1 g	Trypsin inhibitor	0.02			Filter solutions through 0.22mm filter
	add to 50 ml	EBSS
	50 ml final		set pH to 7.4
	Coating buffer (pH 9.5)			4°C
	6.4 g	Tris	50 mM
	add to 1 l	ddH2O
	1 l final		set pH to 9.5
	DNase			aliquots at -20°C
	12500 units	DNase	12500 units/ml
	1 ml	EBSS
	1 ml final
	Tris buffer (pH 8.5)			4°C
	6.4 g	Tris	250 mM
	add to 250 ml	ddH2O
	250 ml final		set pH to 8.5 at 4°C
	Filter solutions through 0.22mm filter
